# Supplementary material
Source: publisher site journal article supplement (https://www.spandidos-publications.com/8184/downloadSupplementary)

Figure S1. Effects of H<sub>2</sub>O<sub>2</sub> and Pue on the viability of H9C2 cells. (A) CCK-8 assays were used to detect the optimal concentration of H<sub>2</sub>O<sub>2</sub>. \*\*\*\*P<0.0001 vs. 0 μM group. (B) Quantification of CCK-8 results determined the optimal duration of H<sub>2</sub>O<sub>2</sub> treatment for cell viability. \*\*\*\*P<0.0001 vs. 0 min group. (C) CCK-8 assays were used to detect the optimal concentration of Pue for cell treatments. \*\*P<0.01 and \*\*\*\*P<0.0001 vs. 0 μM group. (D) The morphology of cardiomyocytes was observed by light microscope (magnification, x100 and x200, respectively). CCK-8, Cell Counting Kit-8; Pue, puerarin.

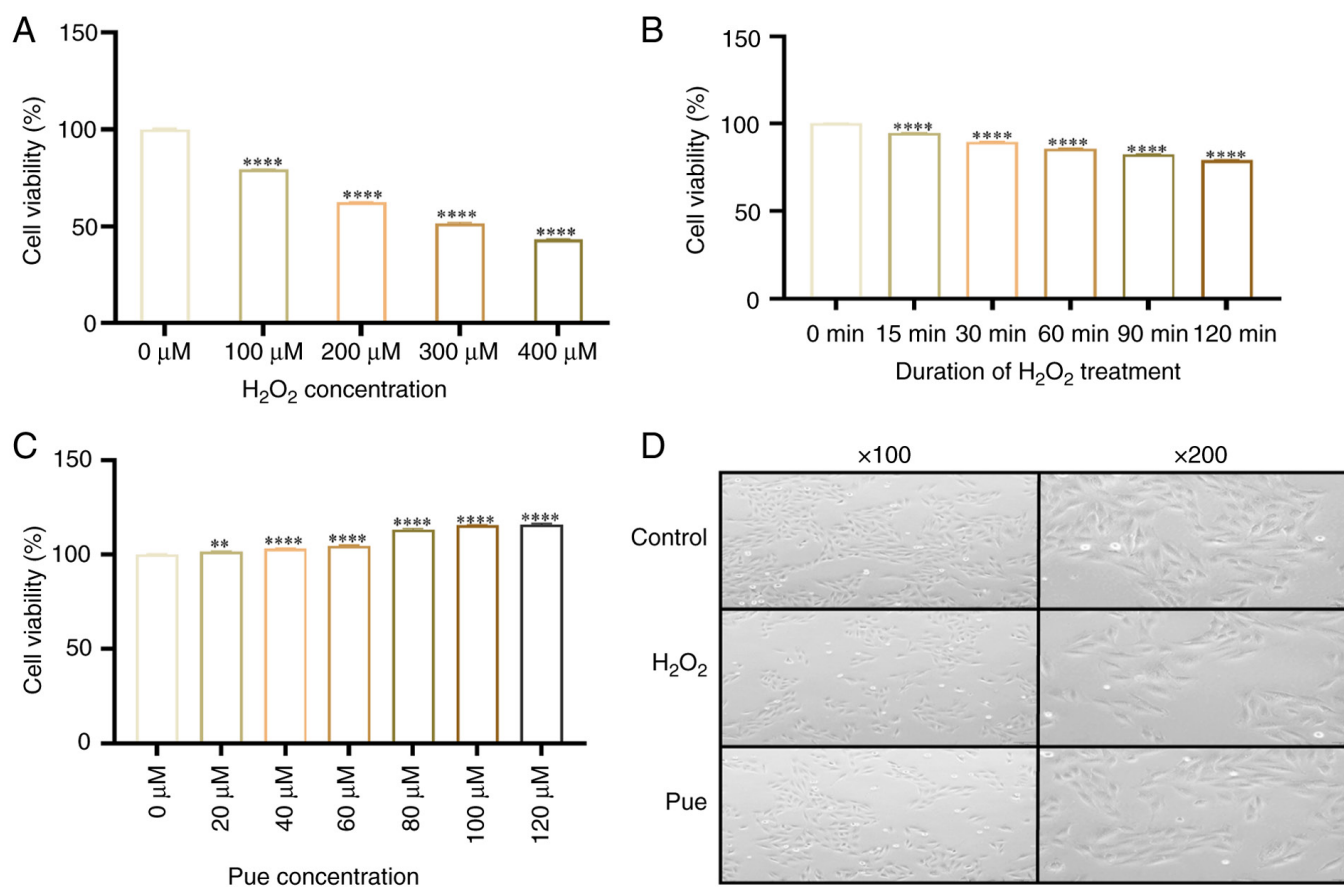

Supplement: Supplementary file 1 [file downloadSupplementary]
